# Supplementary material for: Competition between Methanogens and Acetogens in Biocathodes: A Comparison between Potentiostatic and Galvanostatic Control
Source: Int J Mol Sci. 2017 Jan 19;18(1):204. doi: 10.3390/ijms18010204 (PMC5297834; doi:10.3390/ijms18010204)
Supplement: Supplementary file 1 [file ijms-18-00204-s001.pdf]

# Supplementary Materials: Competition between Methanogens and Acetogens in Biocathodes: A Comparison between Potentiostatic and Galvanostatic Control

Sam D. Molenaar, Pradip Saha, Annemerel R. Mol, Tom H. J. A. Sleutels, Annemiek ter Heijne and Cees J. N. Buisman

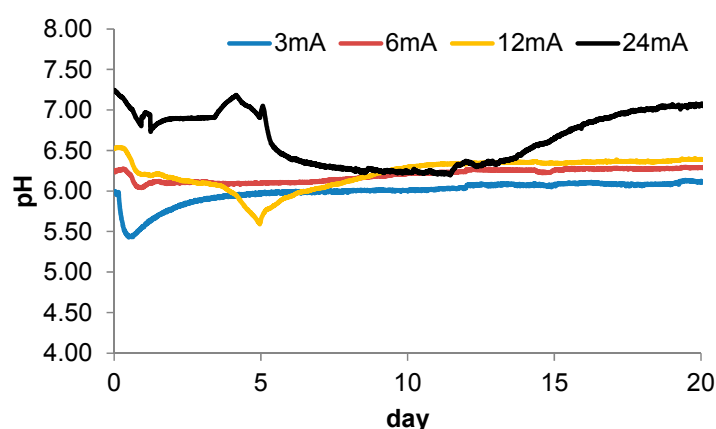

**Figure S1.** pH profiles of the 4 different current densities tested during the current controlled experiments.

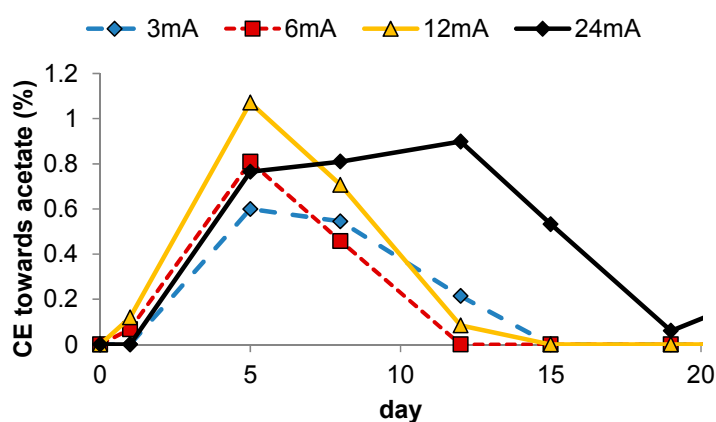

**Figure S2.** Acetate productions of the 4 different current densities tested during the current controlled experiments, with acetate production expressed as Coulombic efficiency (%), so normalized to the applied current.

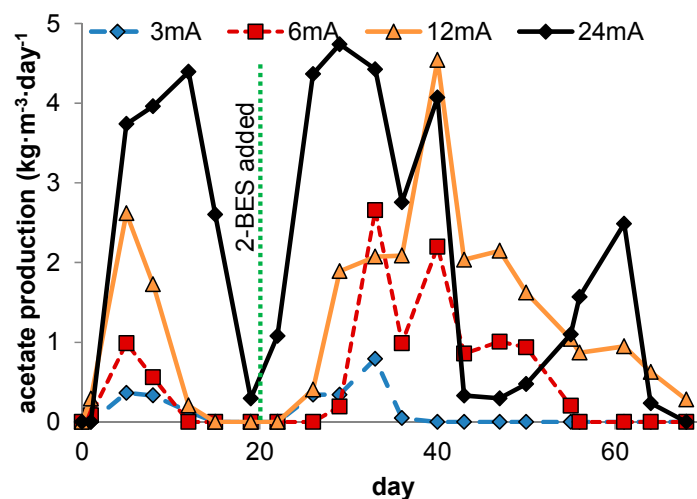

**Figure S3.** Acetate production rates as measured throughout the extended runs of the 4 current densities tested during the current controlled experiments. The green dotted line indicates the moment the systems were spiked with 10 mM of the methanogen inhibiting compound 2-bromoethanosulfonic acid (2-BESA).
